# Supplementary material
Source: Springer Nature journal article supplement (https://www.springermedizin.de/resource/supplementary/12889_2011_3407_MOESM2_ESM.pdf/9488980)

# DE-PLAN-CAT- PREDICE cohort (n=552)

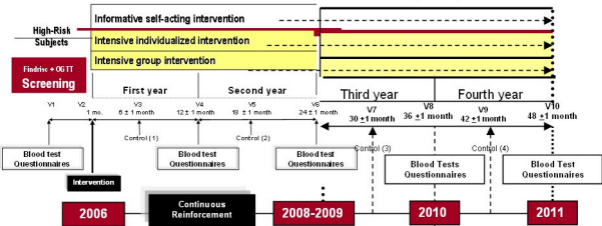

Supplement: MOESM2 [file 9488980]
